# Supplementary material for: Genetic polymorphisms as non-modifiable susceptibility factors to laryngeal cancer
Source: PubMed Central journal article supplement (PMC7201556; doi:10.1042/bsr20191188), 2020-05-05
Supplement: BSR-2019-1188_supp.pdf [file BSR-2019-1188_supp.pdf]

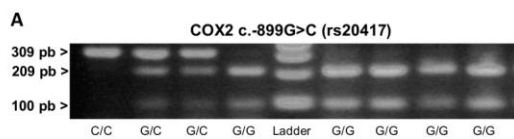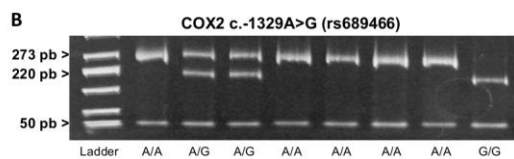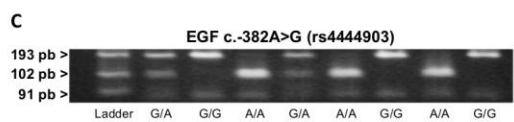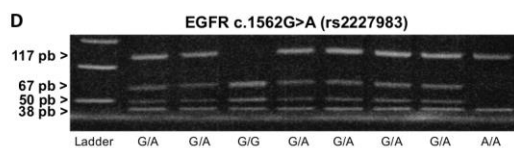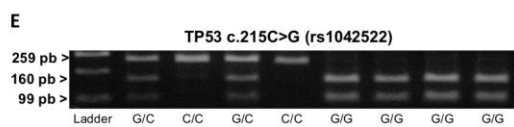

**Supplementary Figure 1:** Representative profile of genotype analyses of selected subjects. a) COX2 c.-899G>C (rs20417) genotypes; b) COX2 c.-1329 A>G (rs689466) genotypes; c) EGF c.-382A>G (rs4444903) genotypes; d) EGFR c.1562G>A (rs2227983) genotypes and e) TP53 c.215C>G (rs1042512) genotypes.
